# Supplementary material for: A sequestered fusion peptide in the structure of an HIV-1 transmitted founder envelope trimer
Source: PubMed Central journal article supplement (PMC6382815; doi:10.1038/s41467-019-08825-7), 2019-02-20
Supplement: 41467_2019_8825_MOESM2_ESM.pdf [file 41467_2019_8825_MOESM2_ESM.pdf]

**A sequestered fusion peptide in the structure of an HIV-1  
transmitted founder envelope trimer**

**Supplementary Information**

Neeti Ananthaswamy, Qianglin Fang, Wadad AlSalmi, Swati Jain et al.

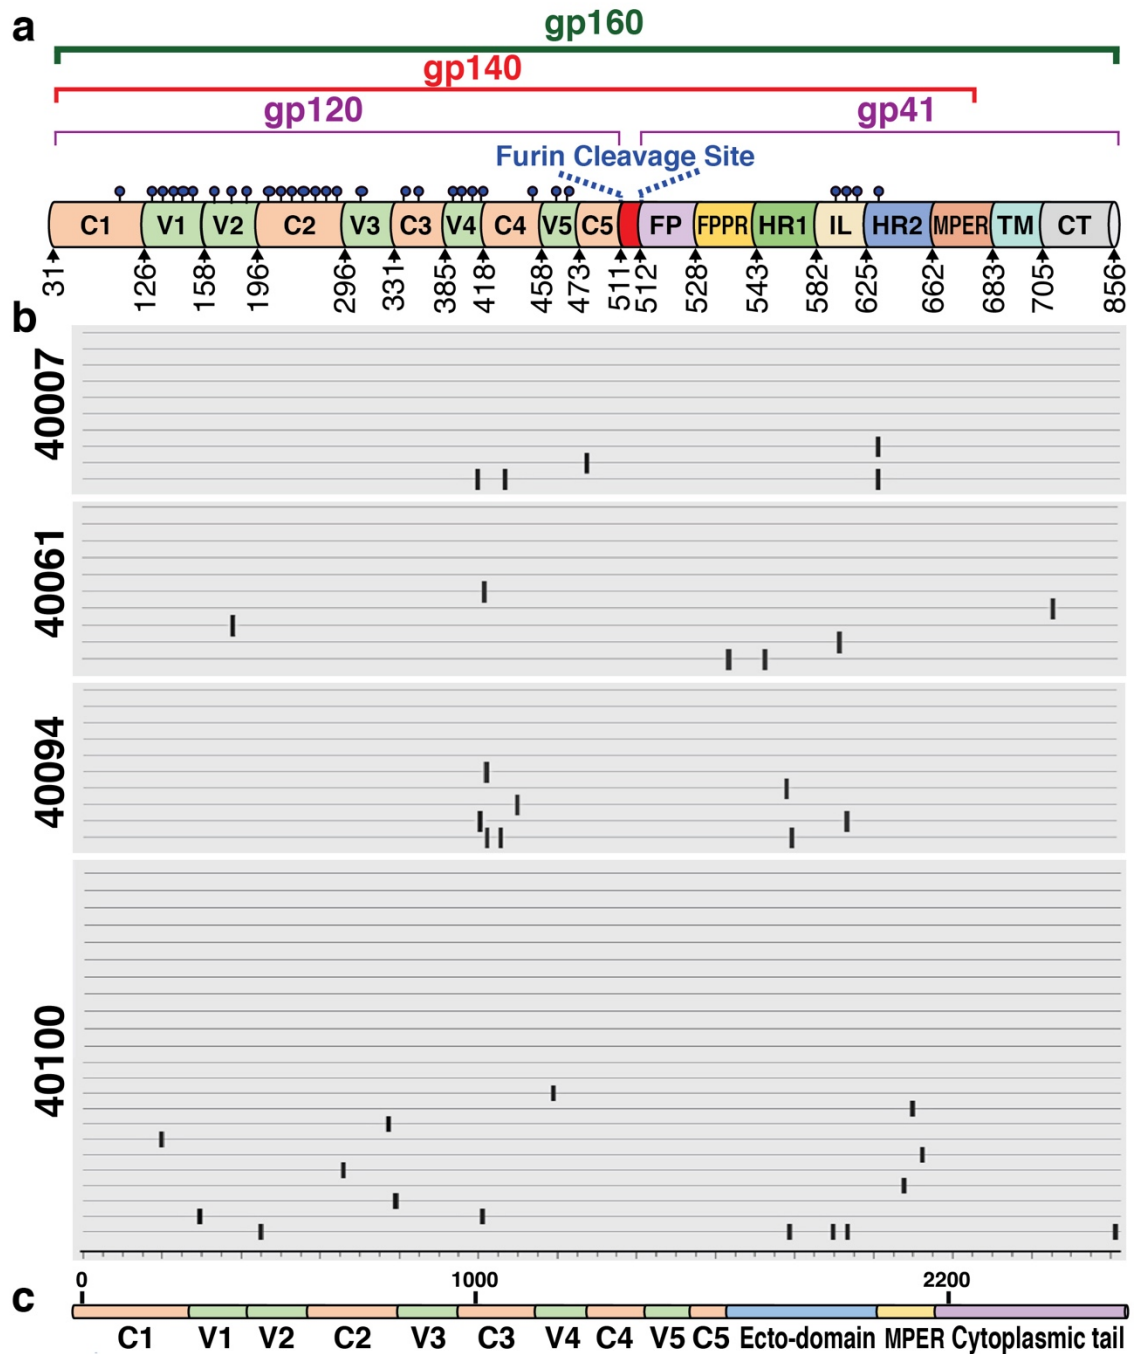

**Supplementary Figure 1.** Schematic representation of HIV-1 envelope proteins. **a** The HIV-1 envelope glycoprotein (Env) is synthesized as a 160 kDa precursor and cleaved by furin protease to produce the heterodimer (protomer) consisting of gp120 and gp41. gp140 represents the external section of the envelope proteins that includes gp120 and gp41 up to the transmembrane domain (TM). gp120 contains five conserved regions (C1–C5) and five variable regions (V1–V5). gp41 contains the fusion peptide (FP) at the N-terminus, the fusion

peptide proximal region (FPPR), the heptad repeat-1(HR-1), the immune dominant loop (IL), the heptad repeat-2 (HR-2), MPER (membrane proximal external region) and CT (cytoplasmic tail). The potential N-linked glycosylation sites are shown as blue tree symbols. The numbers correspond to the number of the amino acid at that position of the gp160 coding sequence. The N-terminal 30 amino acids that correspond to the signal peptide are not shown because these are replaced with the human CD5 signal peptide in all the gp140 clones. **b** Alignment of Env nucleotide sequences from participants of the RV217 study. Each horizontal line represents one gp160 sequence amplified from the plasma of participants from the RV217 Early Capture HIV Cohort Study by single genome amplification and sequenced. The Highlighter software is used to align the sequences. Each short vertical line represents a single mutation at that position of the aligned sequence relative to the most common sequence from the respective participant. **c** Schematic representation of the gp160 Env polypeptide aligned with the corresponding nucleotide sequences shown above.

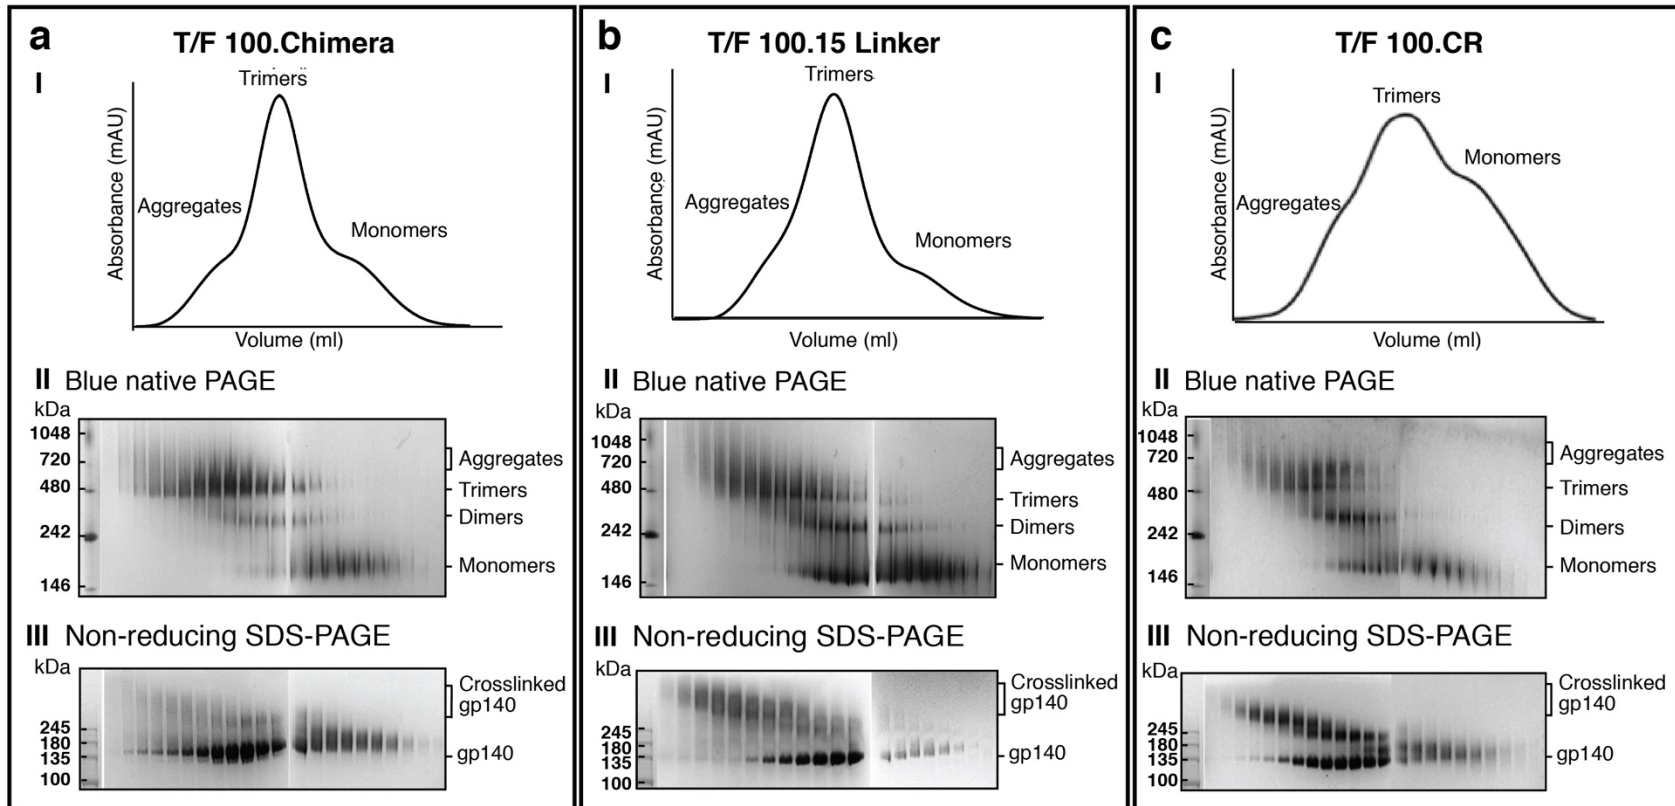

**Supplementary Figure 2.** Linker and Chimera trimers show significant amounts of aggregated and crosslinked gp140. **(I)** Elution profiles of: **a** T/F100.Chimera; **b** T/F100.15 Linker gp140; and **c** T/F100.CR gp140. CR represents cleavage resistant gp140 containing the furin cleavage-resistant sequence SEKS in place of the cleavage-sensitive sequence REKR<sup>1</sup>. The gp140s were purified by StrepTactin affinity chromatography and loaded on a Superdex 200 26/60 size exclusion column. **(II)** Blue native and **(III)** Non-

reducing PAGE of the eluted fractions. A slight gap was introduced between lanes when an image was sliced and pasted. The molecular masses in kDa are shown on the left. All the gels were stained with Coomassie Blue dye. See Methods for more details.

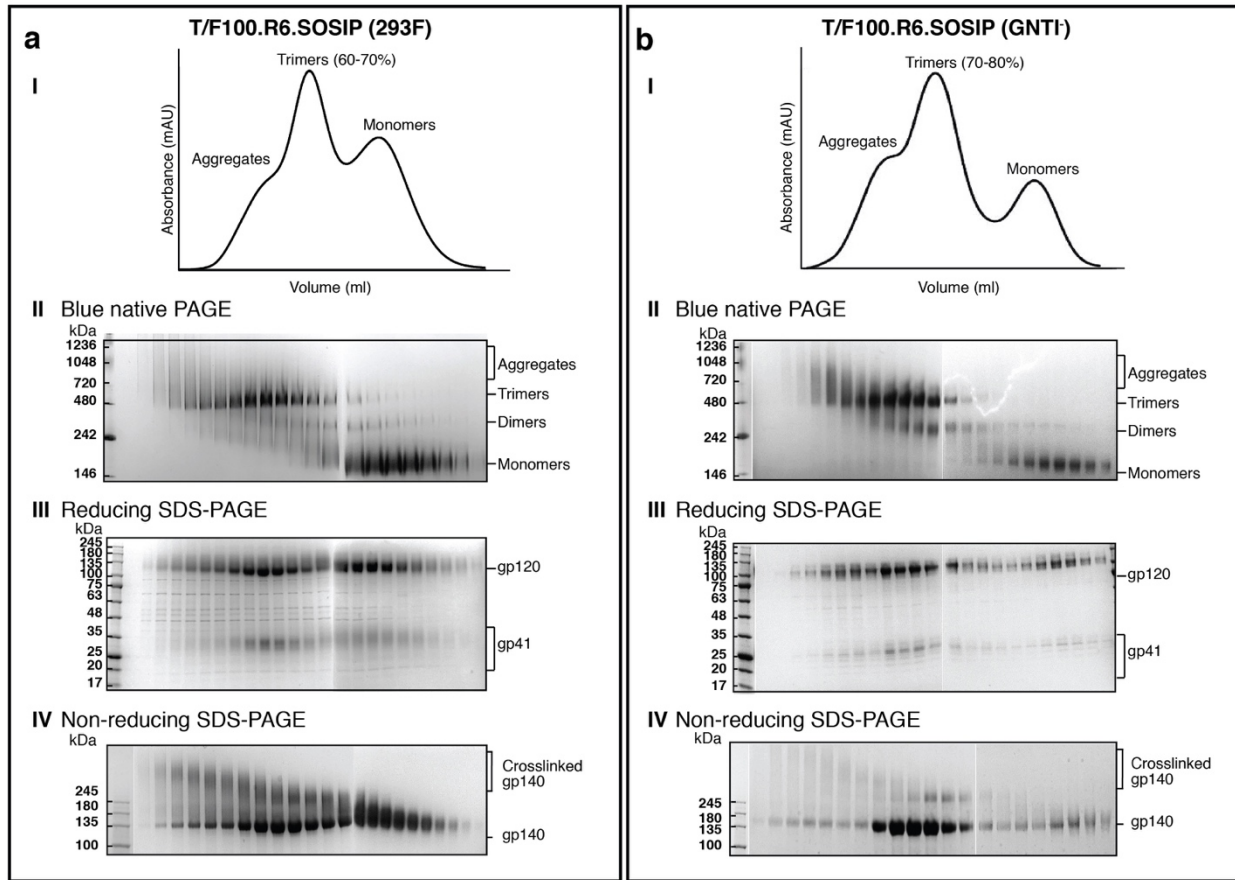

**Supplementary Figure 3.** Cleaved native-like T/F100 trimers produced in GNTI<sup>-</sup> cells were more homogeneous. **a** T/F100 gp140 produced in 293F cells. **b** T/F100 gp140 produced in GNTI<sup>-</sup> cells. **(I)** Elution profiles on a Superdex 200 26/60 size exclusion column. The gp140s were purified by StrepTactin affinity chromatography and loaded on the size exclusion column. **(II)** Blue native, **(III)** reducing, and **(III)** non-reducing PAGE of the eluted fractions. Note that the GNTI<sup>-</sup> produced trimers form relatively compact bands and contain less aggregates and/or crosslinked oligomers when compared to 293F produced trimers (compare panel IV of 293F fractions **(a)** to the same fractions of GNTI<sup>-</sup> **(b)**). A slight gap was introduced between lanes when an image was sliced and pasted. The molecular masses in kDa are shown on the left. All the gels were stained with Coomassie Blue dye. See Methods for more details.

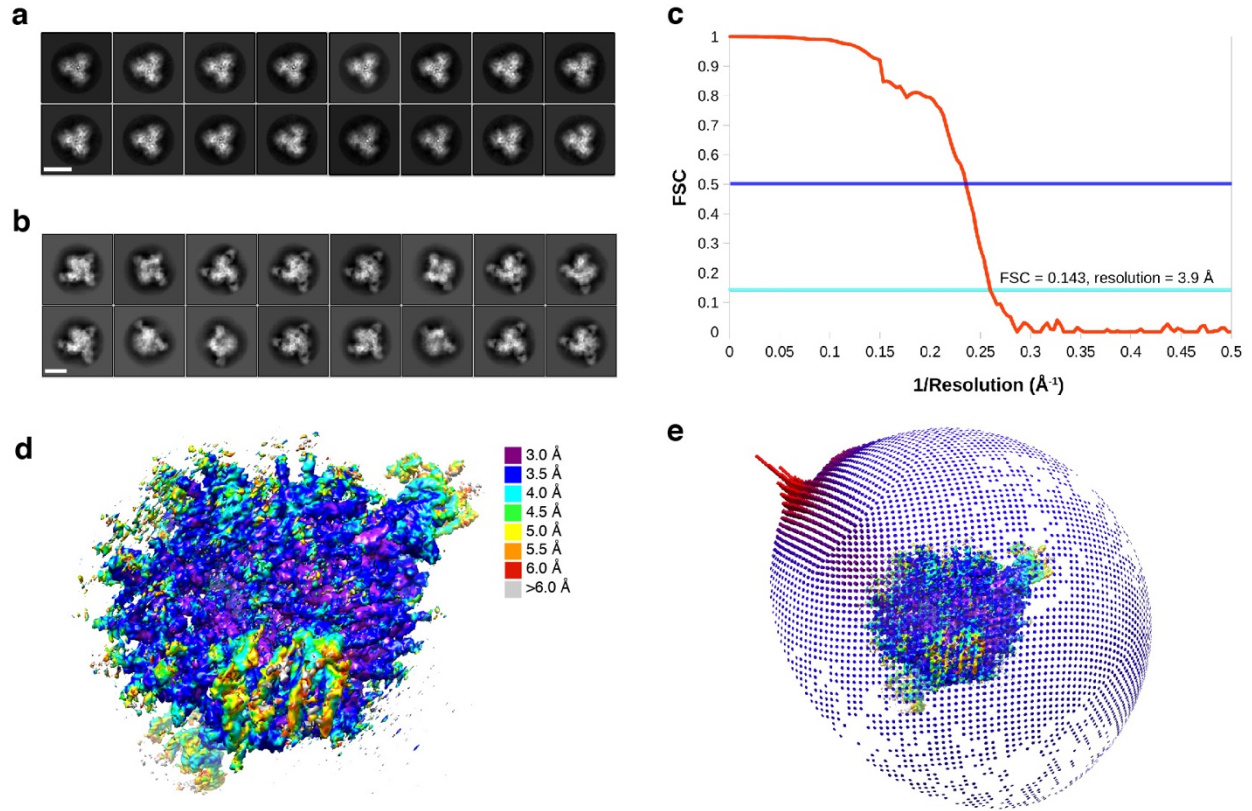

**Supplementary Figure 4.** Cryo-EM statistics. **a** Cryo-EM 2D class averages of the unliganded T/F100 trimers. **b** Cryo-EM 2D class averages of the T/F100 trimer in complex with the Fab fragment of the bNAb 8ANC195. **c** Gold-standard FSC curve, **d** local resolution estimate<sup>2</sup> and **e** angular distribution plot for the 3D cryo-EM reconstruction of the T/F100 trimer in complex with the Fab fragments of the bNAb 8ANC195. Scale bars, 100 Å.

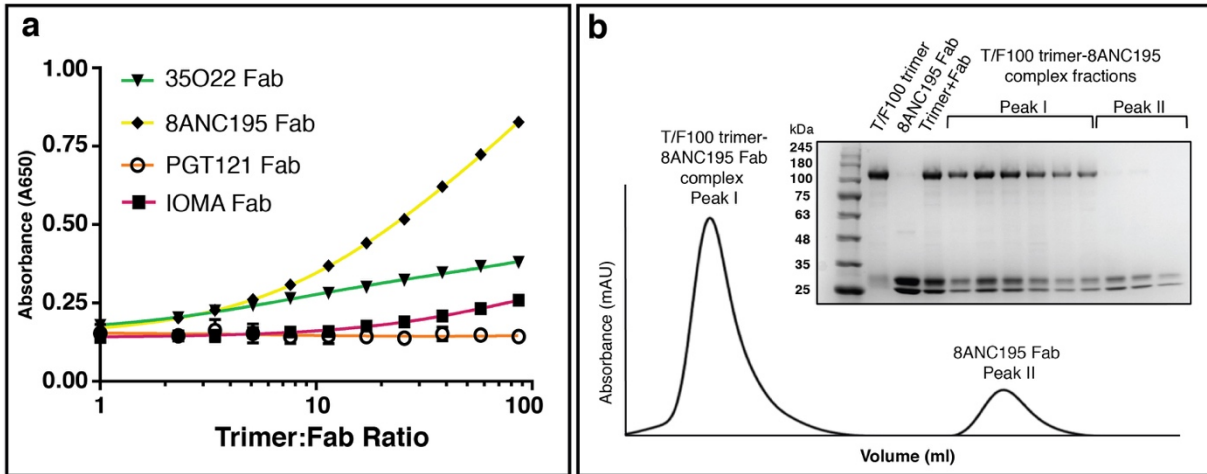

**Supplementary Figure 5.** The 8ANC195 broadly neutralizing antibody shows stronger binding to T/F100 trimers. **a** ELISA results comparing the binding of Fabs of various bNAbs to T/F100 trimers. The trimer:Fab ratio represent the molar ratio of trimers to Fab molecules. Results shown are representative of two independent experiments done in triplicates. Error bars denote standard deviation. **b** Size exclusion elution profile of the T/F100-8ANC195 Fab complex. Inset shows the SDS-PAGE of T/F100 trimer-8ANC195 Fab complex fractions (Peak 1). Molecular masses in kDa of the standard marker proteins are shown on the side of the gel.



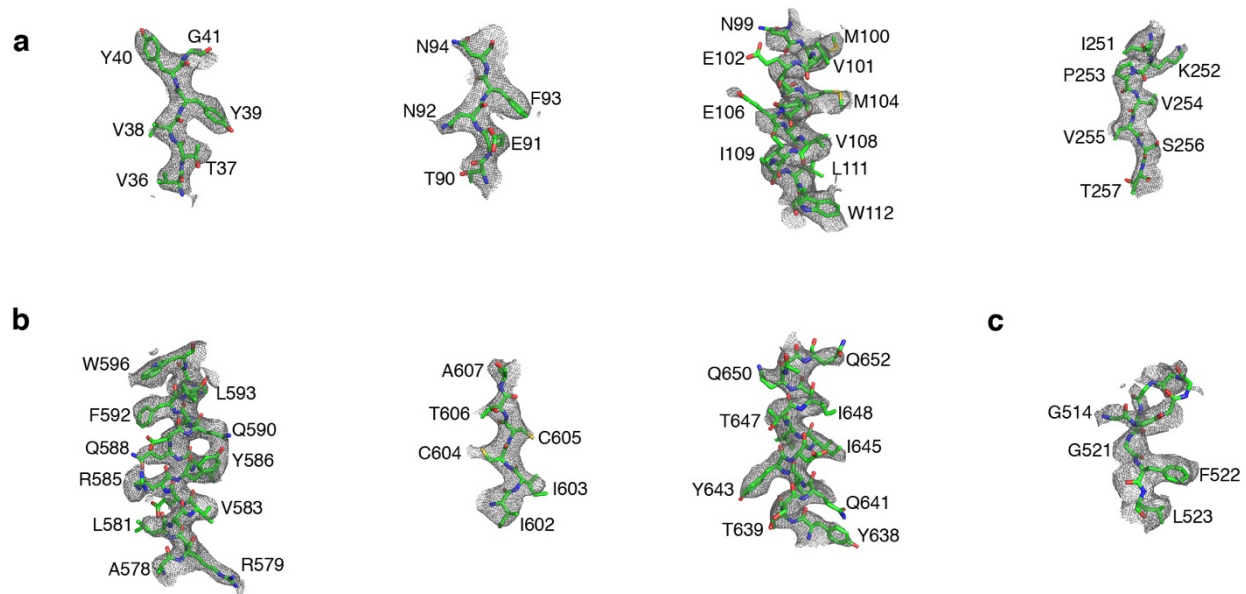

**Supplementary Figure 6.** Representative regions of the 3D cryo-EM reconstruction showing the T/F100 trimer in complex with the Fab fragments of the bNAb 8ANC195. **a** gp120. **b** gp41. **c** the fusion peptide region. Because residues 515-520 do not have reliable side-chain information, side chains of these residues were not modeled.

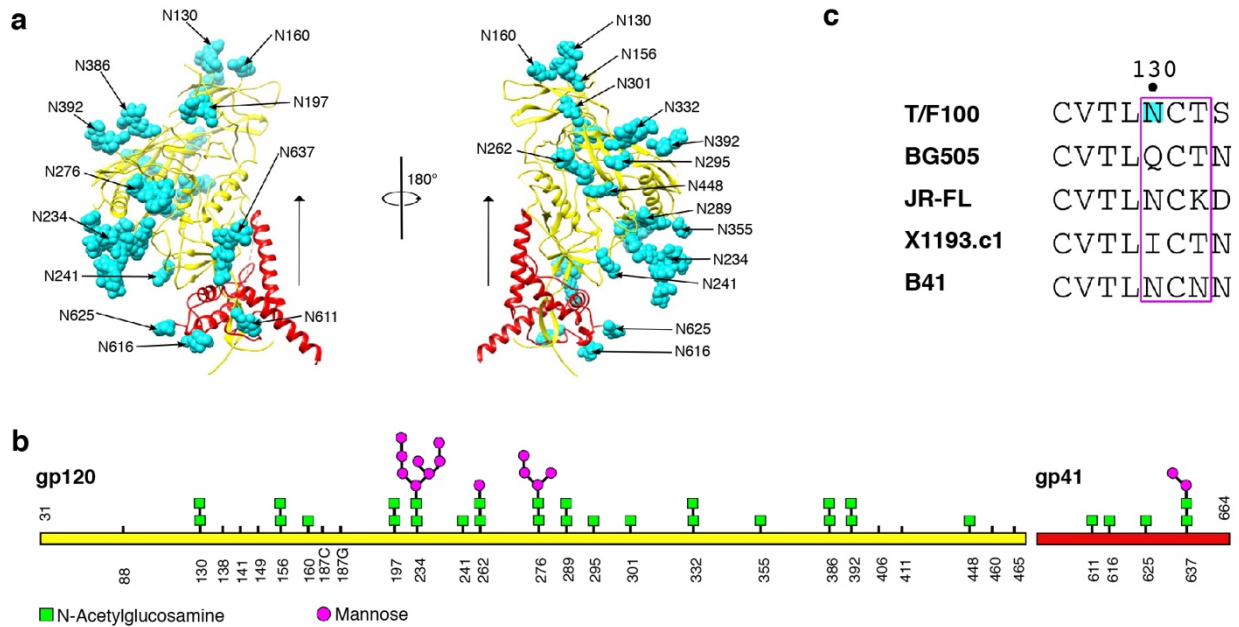

**Supplementary Figure 7.** N-linked glycosylation of the T/F100 trimer. **a** The visible N-linked glycans of one protomer in the structure of the T/F100 trimer. gp120 and gp41 are represented by ribbon diagrams, and colored yellow and red, respectively. N-linked glycans are represented by cyan spheres. **b** Schematic of N-linked glycans with all the potential N-linked glycosylation sites labeled and all the resolved sugar moieties shown. **c** The amino acid sequence around N130 of the T/F100 trimer is aligned to corresponding sequences of HIV-1 trimer structures from other strains. The potential N-linked glycosylation site of the T/F100 molecule is highlighted in cyan.

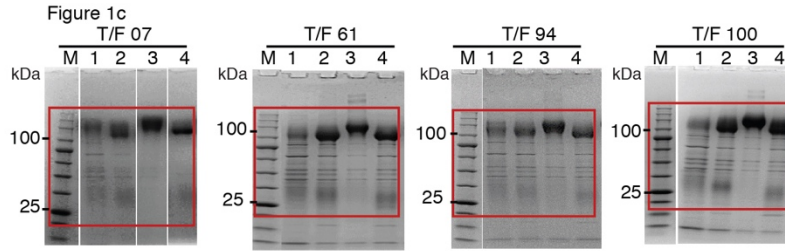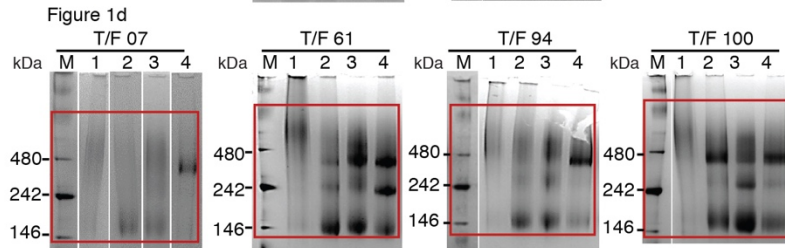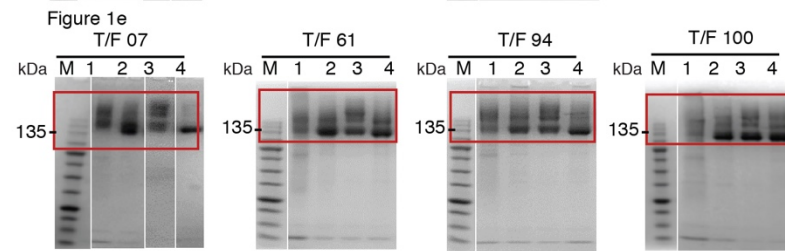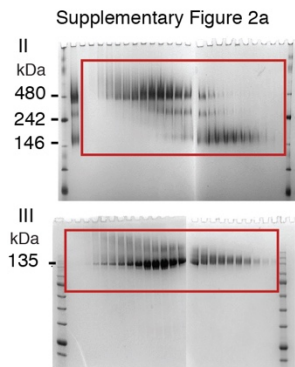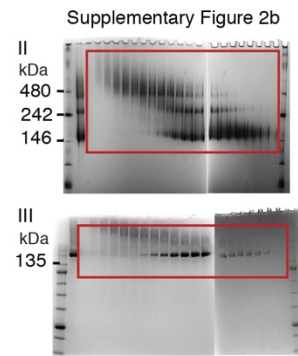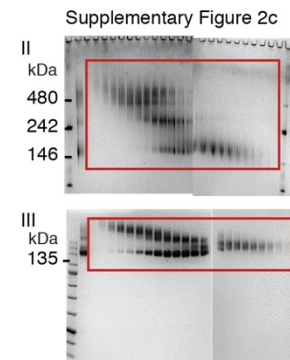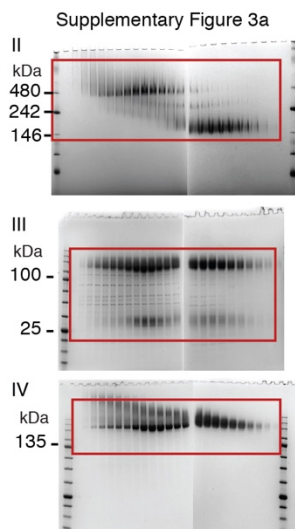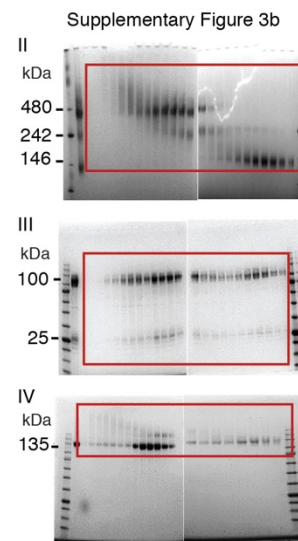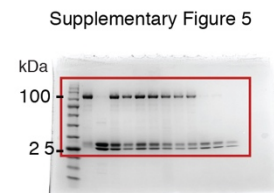

**Supplementary Figure 8.** Uncropped protein gels of various gp140 Env constructs. All the uncropped protein gels of the gp140 constructs shown in various figures in the main paper and supplementary information are provided in this figure. Red boxes in each panel correspond to the lanes shown in the respective figures.

Supplementary Table 1

Biochemical characterization of T/F CRF01\_AE gp140 protomers

| T/F gp140     | Construct | Monomers | Dimers | Trimers | Aggregates | Non-Specific Crosslinking |
|---------------|-----------|----------|--------|---------|------------|---------------------------|
| <b>T/F07</b>  | WT        | –        | –      | –       | ++++       | +++                       |
|               | SOSIP     | +++      | –      | +       | ++         | ++                        |
|               | 15Linker  | +        | +      | ++      | +++        | +++                       |
|               | Chimera   | –        | –      | +++     | ++         | ++                        |
| <b>T/F61</b>  | WT        | –        | –      | –       | ++++       | +++                       |
|               | SOSIP     | +++      | +      | +       | ++         | ++                        |
|               | 15Linker  | ++       | +      | ++      | +++        | +++                       |
|               | Chimera   | +        | +++    | +++     | ++         | ++                        |
| <b>T/F94</b>  | WT        | –        | –      | –       | ++++       | ++                        |
|               | SOSIP     | +++      | +      | +       | ++         | ++                        |
|               | 15Linker  | ++       | ++     | ++      | +++        | +++                       |
|               | Chimera   | +        | –      | +++     | ++         | ++                        |
| <b>T/F100</b> | WT        | –        | –      | –       | ++++       | +++                       |
|               | SOSIP     | ++       | +      | ++++    | +          | +                         |
|               | 15Linker  | +++      | ++     | +       | +++        | +++                       |
|               | Chimera   | +        | +      | +++     | ++         | ++                        |

**Supplementary Table 2**

**RMSD between equivalent C $\alpha$  atoms of the T/F100 trimer and the other 15 HIV-1 Env trimer structures in the prefusion closed state (Comparisons were made with the T/F100 trimer superimposed onto each of the other trimers.)**

| <b>PDB accession no.</b> | <b>Strain</b> | <b>RMSD (Å)</b> | <b>Number of equivalenced atoms</b> |
|--------------------------|---------------|-----------------|-------------------------------------|
| 4TVP                     | BG505         | 1.5             | 1542                                |
| 4ZMJ                     | BG505         | 1.5             | 1530                                |
| 5ACO                     | BG505         | 1.8             | 1512                                |
| 5CEZ                     | BG505         | 1.5             | 1533                                |
| 5CJX                     | BG505         | 1.5             | 1458                                |
| 5D9Q                     | BG505         | 1.5             | 1527                                |
| 5FYJ                     | X1193.c1      | 1.6             | 1536                                |
| 5FYK                     | JR-FL         | 1.6             | 1524                                |
| 5FYL                     | BG505         | 1.5             | 1554                                |
| 5I8H                     | BG505         | 1.5             | 1533                                |
| 5T3X                     | BG505         | 1.7             | 1512                                |
| 5T3Z                     | BG505         | 1.6             | 1524                                |
| 5UM8                     | 16055         | 1.5             | 1560                                |
| 5V8L                     | BG505         | 1.7             | 1536                                |
| 5V8M                     | BG505         | 1.7             | 1509                                |

**Supplementary Table 3**

**Codon-optimized gp140 Env DNA sequences**

| (T/F)<br>CRF01_AE<br>HIV-1 gp140<br>envelope | Codon Optimized gp140s                                                                                                                                                                                                                                                                                                                                                                                                                                                                                                                                                                                                                                                                                                                                                                                                                                                                                                                                                                                                                                                                                                                                                                                                                                                                                                                                                                                                                                                                                                                                                                                                                                                                                                                                                                                                                                                                                                                                                  |
|----------------------------------------------|-------------------------------------------------------------------------------------------------------------------------------------------------------------------------------------------------------------------------------------------------------------------------------------------------------------------------------------------------------------------------------------------------------------------------------------------------------------------------------------------------------------------------------------------------------------------------------------------------------------------------------------------------------------------------------------------------------------------------------------------------------------------------------------------------------------------------------------------------------------------------------------------------------------------------------------------------------------------------------------------------------------------------------------------------------------------------------------------------------------------------------------------------------------------------------------------------------------------------------------------------------------------------------------------------------------------------------------------------------------------------------------------------------------------------------------------------------------------------------------------------------------------------------------------------------------------------------------------------------------------------------------------------------------------------------------------------------------------------------------------------------------------------------------------------------------------------------------------------------------------------------------------------------------------------------------------------------------------------|
| 40007                                        | <p>CGCCAGCGACAACCTGTGGGTCACCGTGTACTACGGCGTGCCCGTGTGGCGGGATGCCGATACCACACTGTTCTGTGCCAGCGACGCCAAGGCCACGAAACCGAGGCCATAATGTGTGGGCCACCCACGCTGCGTGCCACC GATCCTAACCCAGGAAATCCACCTGAAAAACGTGACCGAGAACTTCAACATGTGGAAGAACAACATGGTGAACAGATGCAGGAAGATGTGATCAGCCTGTGGGACCAGAGCCTGAAGCCCTGCGTGAAGCTGACCCCTCTGTGCGTGACCCTGAACTGCTCCAGCAACATCACCGTGCAGCAACATCACAAATCGCCAACGACACCTACGACATC GGCAATATCACCGAGGCCAAGCAATTCAGACTTCAATATGACCACCGAGATCAAGGAACAAGAACAAAGAACAGCGGGTGACGCCCCTGTTCTACAAGCTGGACATCGTGCCCATCAAGGATAACAACAACGACAGCGTGAATACCGGCTGATCAACTGCAACACCAGCGTATCAAGCAGGCCTGTCCCAAGATCAGCTTCGACCCCATCCCCATCCACTACTGCACCCCTGCCGGCTACGCCATCCTGAAGTGCAACGAGAAGAATTTCAACGGCAAGGGCCCTGCAAGAACGTGTCCAGCGTGCAGTGTACCCACGGCATCAAGCCCGTGGTGTCCACCCAGCTGCTGAATGGCAGCTGGCCGAGGAAGAGATCATCATCAGAAGCGAGAACCTGACCGACAACGCCAAGACCATCATCGTGACCTGAACGAGTCCGTGGAAATCAATTGCACCCGGCCCTCCAAACACCCCGACCGGAATCCACATCGGCCAGGC CAGGTGTTCTACCGGACCGGCACATCATCGGCAACATCCGGCAGGCCACTGCAAAATCAACGGCACCAAGTGGCGAAGGTGCTGAAACAGGTCTGGGCAAGCTGAGAGAGCACTTCGAGAACAAGAACATCAACTTCCAGCCCCCTCTGGCGGCGACCTGGAATCACCATGCACCATTCAACTGTGGGGCGAGTCTTCTACTGCAAT ACCACCCGGCTGTCAACACCACCAGACTGTTTAAACAACCTACAACAACCAGACCTGCAACGATACCATCATCTGCCTTGCAAGATTAAGCAGATCATCCGCATGTGGCAGGAAGTGGGCCAGGCTATGTACGCCCTCCTA TCAGCGGCCCATCGTGTGCGTGTCCAAGATCACCGGCATCCTGCTGACCAGAGATGGCGGCGTGAACAACA CCGCAACGAGACATTCAGACCCGGCGGAGGCAACATTAAGGACAACCTGGCGGAGCGAGCTGTACAAGTAC AAGTGGTGCAGATCGAGCCCCTGGGAATCGCCCCTACCAAGTGCAAGAGAAGAGTGGTGCAGAGAAGGCG GCGCAGACGGGCCGTGGGCATCGGAACAATGATCTTCGGCTTCTGGGCGCTGCCGGCTCCACAATGGGAGC CGTCTCTGACCCTGACCGTGCAGGCTAGACAGCTGTGAGCGGCATCGTGCAGCAGCAGAGCAACCTGCTGAGAGCCCCTGAGGCCAGCAGCATCTGCTCCAGCTGACCGTGTGGGGCATCAAGCAGCTCCAGGCCAGAGT GCTGGCCGTGGAAAGATACCTCCAGGACCAGCGGCTGCTGGGACTGTGGGGCTGTAGCGGCAAGATCATCTG TTGCACCGCCGTGCCCTGGAACAGCACCTGGTCCAAAGAGCTACAACGAGATTTGGAGCAACATGACCTG GACCCAGTGGGAGAAAGAGATCAGCAACTACCCGCCAAATCTATGACATCCTGACCGAGAGCCAGAGCC AGCAGGATAAGAACGAGAAGGACCTGCTGGAACCTGGAC</p> |
| 40061                                        | <p>CGCCAGCGACAATCTGTGGGTCACCGTGTACTACGGCGTGCCCGTGTGGAAGGACGCCGACACCACACTGTTCTGTGCCAGCGACGCCAAGGCCACTCTACCGAGGCCATAATGTGTGGGCCACCCACGCTGCGTGCCACC CGATCCTAACCCAGGAAATCCACCTGAAAAACGTGACCGAGAACTTCAATATGTGGAAGAACAACATGGTGGAAACAGATGCAGGAAGATATTACTAGCCTGTGGGACCAGAGCCTCCAGCCCTGCGTGAAGTCAACCCCTCT GTGCGTGACCCTGAACTGCACCAACGCCAACGCCAACGTGAACATCCCCGAGAACCTGAACCTGAAGAA CATCGGCAACATCACCGACGACCTGCGGAACTGCTCCTTCAACATGACCACCGTGTGCGGGACAAGAAAAA ACAGGTGCACGCCCTGTTCTACCGGCTGGACATCGTGAAATGGAAATCAACAACAGCACCAAGTACCGGCTGATCAACTGCAACACCAGCGTATCAAGCAGGCTGACCAAGATCAGCTTCAGCCCATCCCATCCATAC TGCACCCCTGCCGGCTACGCCATCCTGAAGTGCAACGACAAGAATTTCAACGGCACCCGGCCCTGCAAGAAT GTGTCCAGCGTGCAGTGCACCCACGGCATCAAGCCTGTGGTGTCCACCCAGCTGCTGCTGAATGGCAGCCTGG CCGAGGAAGAGATCATCATCAGAAGCGAGAATCTGACCGACAACGCCAAGACCATCATTGTGCACCTGAAACA AGAGCTGGAATCAATTTGCACCCGGCCAGCAACACCAGAACCCAGACATGACCATCGGCCAGGCCAG GTGTTCTACAGAACCAGGAGATCATCGGCAATATCCGGCAGGCCTACTGCGAGATCAACGAGACAAAAGTGG AACGAGACTGAAACAGGTGGCCGCAAGCTGAAAGAGCACTTCAACCGGACCATCCGGTTCAGCCTCCC TCTGGCGGCGACCTGGAATCACCATGCACCATTCAACTGTGGGGCGAGTCTTCTACTGCAATACCACCA AGTGTTTCAACCACACATGCGAGGGCAACGAGGCTGCAATGGCACCAGCAGCAACGGCAGATCATCTGCTG CTTGAGAATCAAGCAGATCATCAATATGTGGCAGGGGCTGGCCAGGCTATGTACGCCCTCCTATCCGGG GCACCATCAACTGCGTGTCCAATATCACCGGCTGCTGCTGACCAGGACGGCGGAAGGATAATAGCACA GCGCAATGAGACATTCAGACCCGGCGGAGGCAATATAAGGACAACCTGGCGGAGCGAGCTGTACAAGTAC AAGTGGTGCAGATCGAGCCCCTGGGAATCGCCCCTACCAAGGCAAGAGAAGAGTGGTGCAGCGCAGGCG ACCGCGCAGAGCCGTGGGCATCGGCGCTATGCTGTTCCGCTTTCTGGGAGCCGCGGAAGCAATATGGGCGC TGCCAGCATCACCTGACCGTGCAGGCTAGACAGCTGCTGAGCGGCATCGTGCAGCAGCAGAGCAACCTGCTGAGAGCCATTGAGGCCAGCAGCATCTGCTCCAGCTGACCGTGTGGGGCATAAGCAGCTCCAGGCCAGAGT GCTGGCCGTGGAAAGATACCTGAAGGACCAGAAATCCTGGGACTGTGGGGCTGCTCTGGCAAGATCATCTG CAAACCCCGTGCCTTGAACAGCACCTGTCCAAACAGAGCTACAACGAGATTTGGAGCAACATGACCTG GATCGAGTGGGAGAGAGATCAGCAATTACCAACCAAAATCTACGAGATCCTGACCGAGAGCCAGAATC AGCAGGACCGGAACGAGAAGGATCTGCTGGAACCTGGAC</p>      |
| 40094                                        | <p>CGCCAGCAACAATCTGTGGGTCACCGTGTACTACGGCGTGCCCGTGTGGCGGGATGCCGATACCACACTGTTCTGTGCCAGCGACGCCAAGGCCACGAGACAGAGATCCACAATGTGTGGGCCACCCACGCTGCGTGCCACC GATCCTAACCCAGGAAATCCCCCTGAAGAACGTGACCGAGAACTTCAATATGTGGAAGAACAACATGGTGAACAGATGCAGGAAGATGTGATCAGCCTGTGGGACCAGAGCCTGAAGCCCTGCGTGAAGCTGACCCCTCTG</p>                                                                                                                                                                                                                                                                                                                                                                                                                                                                                                                                                                                                                                                                                                                                                                                                                                                                                                                                                                                                                                                                                                                                                                                                                                                                                                                                                                                                                                                                                                                                                                                                                                                                     |

|       |                                                                                                                                                                                                                                                                                                                                                                                                                                                                                                                                                                                                                                                                                                                                                                                                                                                                                                                                                                                                                                                                                                                                                                                                                                                                                                                                                                                                                                                                                                                                                                                                                                                                                                                                                                                                                                                                                                                                                                                                                                                                                                                                     |
|-------|-------------------------------------------------------------------------------------------------------------------------------------------------------------------------------------------------------------------------------------------------------------------------------------------------------------------------------------------------------------------------------------------------------------------------------------------------------------------------------------------------------------------------------------------------------------------------------------------------------------------------------------------------------------------------------------------------------------------------------------------------------------------------------------------------------------------------------------------------------------------------------------------------------------------------------------------------------------------------------------------------------------------------------------------------------------------------------------------------------------------------------------------------------------------------------------------------------------------------------------------------------------------------------------------------------------------------------------------------------------------------------------------------------------------------------------------------------------------------------------------------------------------------------------------------------------------------------------------------------------------------------------------------------------------------------------------------------------------------------------------------------------------------------------------------------------------------------------------------------------------------------------------------------------------------------------------------------------------------------------------------------------------------------------------------------------------------------------------------------------------------------------|
|       | <p>TGCGTGACCCTGCACTGCACCAAAGTGACCCTGAACGCCAACGGCACCAACAACGCCACCACCAACAATACC<br/> ATCACCAGAGCCAACGTGACCACCGGCATCAATGTGTCCAACATCACCAGGAAAATCCGGAACGTCTCTTC<br/> AATATCACCACCGAAGTGCGGGACAAGCAGAAACAGGTGCACGCCCTGTTCTACCGGTGGACATCGTGCCC<br/> ATCGACAGCAACAACAACCTCCAACAAGAACAGCAACCGCGAGTACCGGCTGATCAACTGCAACACCAGCGT<br/> GATCAAGCAGGCCTGTCCAAAGGTGTCTTCGACCCCATCCCCATCCACTACTGTACCCCTGCCGGTACGTG<br/> ATCCTGCGGTGC AACGAGAAGAATTTCAACGGCGCTGGCCCTTGCAAGAAATGTGTCTCCGTGCAGTGTACCC<br/> ACGGCATCAAGCCCCGTGGTGTCCACCCAGCTGCTGCTGAATGGCAGCCTGGCCGAAGAGGAAAATCGTGATCA<br/> GAAGCGAGAACCTGACCAACAATGCCAAGACCATCATTGTGCACCTGAACGAGAGCGTGACCATCAATTGCA<br/> CCCGGCCCTCCAACAACACCCGGACCAGCATCAGAATCGGCCAGGCCAGGTGTTCTACCAGACCGGCCAGA<br/> TCACCGGCGACATCCGGAAGGCCTATTGCGAGGTGGACGAGGCCAAGTGGAAACAAGACCTGAAACAGGTG<br/> GCCGAGAAGCTGAAGAAGCACTTCAACAGCACCACCATCATCTTCCAGCCCCCTCTGGCGGGACCTGGAA<br/> ATCACCACCCTGCATTTCAACTGTCTGGGGGAGTTCCTTACTGCAATACCACCAGCTGTTCAACAAGACCT<br/> ACATCGGCAACGAGACACGGAACGAAACCCAGCAGCGCGGACGCAACAAGACAATCACCTGCCCTGCAAG<br/> ATTAAGCAGATCGTGCAGATGTGGCAGGGCGTGGGCCAGGCTATGTATGCCCTCTATCAGCGGAGTGATC<br/> AATTGCGTGTCCAATATTACCGGCATCTGTGACCAGGGACGGCGGACAGGGCGGCCACAACAACAACC<br/> GAGACAGAAAACCTTCAGACCCGGCGGAGGCAACATCAAGGACAACCTGGCGGAGCGAGCTGTACAAGTACAA<br/> GGTGGTGCAGATCGAGCCCCTGGGAATCGCCCCCAAGAGCCAAGCGCGGGTGGTGGAAACAGGAC<br/> GGCGCAGAGCCGTGGGCATCGGGCTATGATCTTCGGCTTTCTGGGAGCCGCCGGAAGCACAATGGGCGCTG<br/> CCAGCATCACCTGACCGTGCAGGCTAGACAGCTGCTGAGCGGCATCGTGACGACGAGAGCAACCTGCTGA<br/> GAGCCATCGAGGCCAGCAGCATCTGCTCCAGCTGACCGTGTGGGGAATCAAGCAGCTCCAGGCCAGAGTGC<br/> TGGCGTGGAAGATACCTGAAGGACCAGAAATTCCTGGACTGTGGGGTGTCTCCGGGAAGATACCTGCA<br/> CAACCGCCGTGCCTTGAACAGCACCTGGTCCAACAGAAGCTATGAGGAAATTTGGAACAACCTGACCTGGG<br/> TGAATGGGAGAGAGAGATCAGCAACTACCCAACCAAAATCTACGCCATCTGACCGAGAGCCAGAACCAG<br/> CAGGACCGGAACGAGAAGGACCTGCTGGAACCTGGAC</p>                                                                                                                                                                                                                                                    |
| 40100 | <p>CGCCACCAACAATCTGTGGGTACCGTGTACTACGGCGTGCCCGTGTGGCGGGATGCCGATAACCACACTGTT<br/> TGTGCCAGCGACGCCAAGGCCACGAGACAGAGTGCACAATGTGTGGGCCACCCACGCTGCGTGCCACC<br/> GATCCTAACCCCAAGGAAATGCACCTGAAGAACGTGACCGAGAATTCAATATGTGGAAGAACAATAGGTG<br/> GAACAGATGCAGGAAGATGTGATCAGCCTGTGGGACCAGAGCCTGAAGCCCTGCGTGAAGCTGACCCCTCTG<br/> TGCGTGACCCTGAACTGCACCAGCGCCACCGTACCAACTACACCAAAGTGAACGACACCAGCGACATCATC<br/> GGCAACATCACCGACGACGTGCGGAACCTGCTCCTTCAACATGACCACCGAGCTGCGGGACAAGCAGCAGAA<br/> GTGTACGCCCTGTTCTACAAGCTGGACATCGTGCCCATCGACGACAGCAGCAACAACGGCAGCTCCAACCTC<br/> AGCGAGTACCGGTGATCAACTGCAACACCAGCGTATCAAGCAGGCCTGTCCAAAGGTGTCTTCGACCCC<br/> ATCCCCATCCACTACTGTACCCTGCCGGTACGCCATCTGCGGTGCAACGACAAGAAGTTCAACGGCACCG<br/> GCCCTTGAAGAATGTGTCCAGCGTGCAGTGCACCCACGGCATCAAGCCTGTGGTGTCCACCCAGCTGCTGCT<br/> GAATGGCAGCCTGGCCGAGGAAGGCATCATCATCAGAAGCGAGAACCTGACCAACAACGCCAAGACCATCA<br/> TCGTGCACTTCAACGAGAGCGTGAAGATCAATTGCACCCGGCCCTCCAACAACACCCGGACCGGAATCCACA<br/> TCGGCCCAGGCCAGGTGTTCTATAAGACCGGCATATTATCGGGGACATCCGGAAGGCCTACTGCAACATCTC<br/> TGGCGCCCAGTGGCACAAGGTGCTGGGCAGAGTGGCCAACAAGCTGAAAAGAGCACTTAAACAACAAGACAA<br/> TCGTGTTCAAGCCAGCTCTGGCGGGACCCCGAGATCACCATGCACCACTTCAACTGTCTGGGGCGAGTCTT<br/> CTACTGCAATACCACCAAGCTGTTCAACAGCACCTGGGGCGGCAACAAGAACGAGACACGGGACAACGGAA<br/> CCATACCATCCCTTGCAGAATCAAGCAGATCATCAATATGTGGCAGGGCGTGGGCCAGGCTATGTACGCC<br/> CTCCTATCAAGGGCGTGATCAAAATGCCTGAGCAATATCACCGGCATCCTGCTGACCAGGGACGGCGGCAATG<br/> ACAGCACCGAGAACAACGAGACATTCAGACCCGGCGGAGGCAATATCAAGGACAACCTGGCGGAACGAGCTG<br/> TACAAGTACAAGGTGGTGCAGATCGAGCCCTGGGAATCGCCCCTACCAAGTGAAGCGGGCGGGTGGTGGAA<br/> CGCAGGCGACGGCGCAGAGCCGTGGGCCTGGGAGCTATGATCTTCGGCTTTCTGGGAGCCGCCGGAAGCACA<br/> ATGGGCGCTGCCAGCATACCCTGACCGTGCAGGCTAGACAGCTGCTGAGCGGCATCGTGACGACGAGAGC<br/> AACCTGCTGAGAGCCCCGGAGGCCAGCAGCATCTGCTCCAGTGACCGTGTGGGGCATCAAACAGCTCCAG<br/> GCCAGAGTGTGGCCGTGGAAGATACTCCAGGACCAGAAATTCCTGGACTGTGGGGTGTCTCCGGCAAG<br/> ATCATCTGTTGACCGCCGTGCCTTGAACAGCTCCTGGTCCAACAAGACCTTCGAAGAGATTTGGAACAATA<br/> TGACCTGGATCGAGTGGGAGCGGAGATCAGCAATTACCAAGCAAAATCTACGACATCTGACCATCAGCC<br/> AGACCCAGCAGGAAAAGAACGAAAAGGACCTGCTGGAACCTGGAC</p> |



## Supplementary Table 4

### Primers used for construction of the gp140 Envs

| gp140 Primers                        | Forward(F)<br>/Reverse (R) | Nucleotide sequences 5'- to -3'                                                                 |
|--------------------------------------|----------------------------|-------------------------------------------------------------------------------------------------|
| Terminal T/F 07.R6                   | F                          | CTAGCTAGCTGCCAGCGACAACCTGTGGGTCACCGT                                                            |
| Terminal T/F 61.R6                   | F                          | CTAGCTAGCCGCCAGCGACAATCTGTGGGTCACCG                                                             |
| Terminal T/F 94.R6                   | F                          | CTAGCTAGCCGCCAGCAACAATCTGTGGGTCACCG                                                             |
| Terminal T/F100.R6                   | F                          | CTAGCTAGCCGCCACCAACAATCTGTGGGTCACCG                                                             |
| Terminal T/F (07, 61,<br>94, 100).R6 | R                          | TTTTCTTTTGGCGCCCGTCCAGTTCAGCAG                                                                  |
| BG505                                | F                          | CTAGCTAGCTGCCGAGAACCTGTGGGTCACCGTGTA                                                            |
|                                      | R                          | TTTTCTTTTGGCGCCCGTCCAGGGCCAGCAGGTC                                                              |
| T/F 07. 15Linker                     | F                          | CCAAGAGAAGAGTGGTGCAGGGCGGAAGTGGAGGCGGCGGCAGCGGGGGAGG<br>TGGCTCCGGAGGAGCCGTGGGCATCGGAACAAT       |
|                                      | R                          | ATTGTTCCGATGCCACGGCTCCTCCGGAGCCACCTCCCCGCTGCCGCCGCCTCC<br>ACTTCCGCCTGCACCACTCTTCTCTTGG          |
| T/F 07. Chimera                      | F                          | CAAGAGAAGAGTGGTGCAGCGCAGGGCAGGCGCAGAGCCGTGGGAATTGGAG<br>CTGT                                    |
|                                      | R                          | ACAGTCCAATTCCCACGGCTCTGCGCCGTCGCCTGCGCTGCACCACTCTTCTCTTG                                        |
| T/F 61. 15Linker                     | F                          | CAAGAGAAGAGTGGTGCAGGGCGGAAGTGGAGGCGGCGGCAGCGGGGGAGGTG<br>GCT CCGGAGGAGCCGTGGGCATCGGCGCTAT       |
|                                      | R                          | ATAGCGCCGATGCCACGGCTCCTCCGGAGCCACCTCCCCGCTGCCGCCGCCTCC<br>ACTTCCGCCTGCACCACTCTTCTCTTGG          |
| T/F 61. Chimera                      | F                          | CAAGAGAAGAGTGGTGCAGCGCAGGGCAGGCGCAGAGCCGTGGGAATTGGAG<br>CTGT                                    |
|                                      | R                          | ACAGTCCAATTCCCACGGCTCTGCGCCGTCGCCTGCGCTGCACCACTCTTCTCTTG                                        |
| T/F 94. 15Linker                     | F                          | GCAAGCGGCGGGTGGTGGAAAGGCGGAAGTGGAGGCGGCGGCAGCGGGGGAGGT<br>GGCTCCGGAGGAGCCGTGGGCATCGGCGCTAT      |
|                                      | R                          | ATAGCGCCGATGCCACGGCTCCTCCGGAGCCACCTCCCCGCTGCCGCCGCCTCCA<br>CTTCCGCCTTCCACCCGCCGCTTG             |
| T/F 94. Chimera                      | F                          | GCAAGCGGCGGGTGGTGGAAAGGCGGAAGTGGAGGCGGCGGCAGAGCCGTGGGAATTGGAG<br>CTGT                           |
|                                      | R                          | ACAGTCCAATTCCCACGGCTCTGCGCCGTCGCCTGCGCTGCACCACTCTTCTCTTG                                        |
| T/F 100. 15Linker                    | F                          | GCAAGCGGCGGGTGGTGGAAAGGCGGAAGTGGAGGCGGCGGCAGCGGGGGAGGT<br>GGCTCCGGAGGAGCCGTGGGCCTGGGAGCTATGATCT |
|                                      | R                          | AGATCATAGCTCCAGGCCACGGCTCCTCCGGAGCCACCTCCCCGCTGCCGCCGC<br>CTCCACTTCCGCCTTCCACCCGCCGCTTG         |
| T/F 100. 20Linker                    | F                          | GGGGAGGTGGCTCCGGAGGAGGCGGTAGCGGAGGGGCCGTGGGCCTGGGAGC<br>TATG                                    |
|                                      | R                          | CATAGCTCCAGGCCACGGCCCTCCGCTACCGCTCCTCCGGAGCCACCTCCCC                                            |
| T/F 100. CR                          | F                          | CAAGCGGCGGGTGGTGGAAAGGCGGAAGAGCGCCGTGGGCCTGGGAGCTATG                                            |
|                                      | R                          | CATAGCTCCAGGCCACGGCGCTCTTCTCGCTTTCACCCACCCGCCGCTTG                                              |
| T/F 100. Chimera                     | F                          | TGCAAGCGGCGGGTGGTGGAAAGGCGGAAGAGCGCCGTGGGCCTGGGAGCTATG<br>GCA                                   |
|                                      | R                          | ACAGTCCAATTCCCACGGCTCTGCGCCGTCGCCTGCGTTCCACCCACCCGCCGCTT<br>GCA                                 |
| BG505-T/F100FP                       | F                          | GTGGGAATTGGAGCTATGATCTTCGGCTTCTGGGCGCTG                                                         |
|                                      | R                          | CAGCGCCAGAAAGCCGAAGATCATAGTCCAATTCAC                                                            |

## Supplementary Table 5

### Cryo-EM data collection, refinement and validation statistics

---

|  |                                                                   |
|--|-------------------------------------------------------------------|
|  | T/F100 trimer-8ANC195 Fab<br>complex<br>(EMDB-0485)<br>(PDB 6NQD) |
|--|-------------------------------------------------------------------|

---

|                                            |         |
|--------------------------------------------|---------|
| <b>Data collection and processing</b>      |         |
| Magnification                              | 29,000  |
| Voltage (kV)                               | 300     |
| Electron exposure ( $e^-/\text{\AA}^2$ )   | 64      |
| Defocus range ( $\mu\text{m}$ )            | 1.5–3.5 |
| Physical pixel size ( $\text{\AA}$ )       | 1.0     |
| Symmetry imposed                           | C3      |
| Initial particle images (no.)              | 353,000 |
| Final particle images (no.)                | 170,716 |
| Map resolution ( $\text{\AA}$ )            | 3.9     |
| FSC threshold                              | 0.143   |
| <b>Refinement</b>                          |         |
| Map sharpening B factor ( $\text{\AA}^2$ ) | -162    |
| R.m.s. deviations                          |         |
| Bond lengths ( $\text{\AA}$ )              | 0.01    |
| Bond angles ( $^\circ$ )                   | 1.44    |
| Validation                                 |         |
| MolProbity score                           | 2.96    |
| Clashscore                                 | 14.7    |
| Poor rotamers (%)                          | 8.15    |
| Ramachandran plot                          |         |
| Favored (%)                                | 88.35   |
| Allowed (%)                                | 10.88   |
| Disallowed (%)                             | 0.77    |

---

## Supplementary References

- 1 AlSalmi, W. *et al.* A new approach to produce HIV-1 envelope trimers: both cleavage and proper glycosylation are essential to generate authentic trimers. *J Biol Chem* **290**, 19780-19795 (2015).
- 2 Kucukelbir, A., Sigworth, F. J. & Tagare, H. D. Quantifying the local resolution of cryo-EM density maps. *Nat Methods* **11**, 63-65 (2014).
